# Supplementary material for: Rhodamine B degradation by nanosized zeolitic imidazolate framework-8 (ZIF-8)
Source: Royal Society of Chemistry journal article supplement (doi:10.1039/c8ra03459a), 2018-01-01
Supplement: c8ra03459a1.pdf [file c8ra03459a1.pdf]

## Rhodamine B degradation by nanosized zeolitic imidazolate framework-8 (ZIF-8)

Michael Chin, Cecilia Cisneros, Stephanie M. Araiza, Kevin M. Vargas, Kristi M. Ishihara and Fangyuan Tian\*

*Department of Chemistry and Biochemistry, California State University Long Beach, Long Beach, CA 90840*

*fangyuan.tian@csulb.edu*

### Supporting Information

**Table S1.** IR absorption frequencies of ZIF-8

| Functional Groups             | IR absorption $\text{cm}^{-1}$ |
|-------------------------------|--------------------------------|
| C=N stretch                   | 1574                           |
| -CH <sub>3</sub> bend         | 1473, 1418                     |
| C-N symmetric stretching      | 1091                           |
| C-N in-plane stretching       | 1180, 1147                     |
| C-H bending in imidazole ring | 1311, 954, 759, 693            |

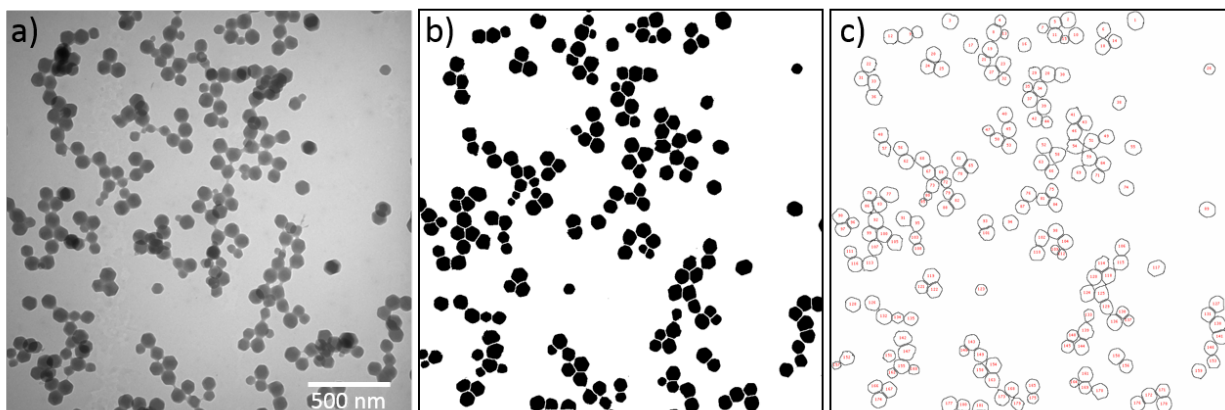

**Figure S1.** The ZIF-8 nanoparticle size distribution analysis was conducted based on the TEM image of over 180 nanoparticles (a), the image was then cropped (b) and analyzed (c) using ImageJ software.

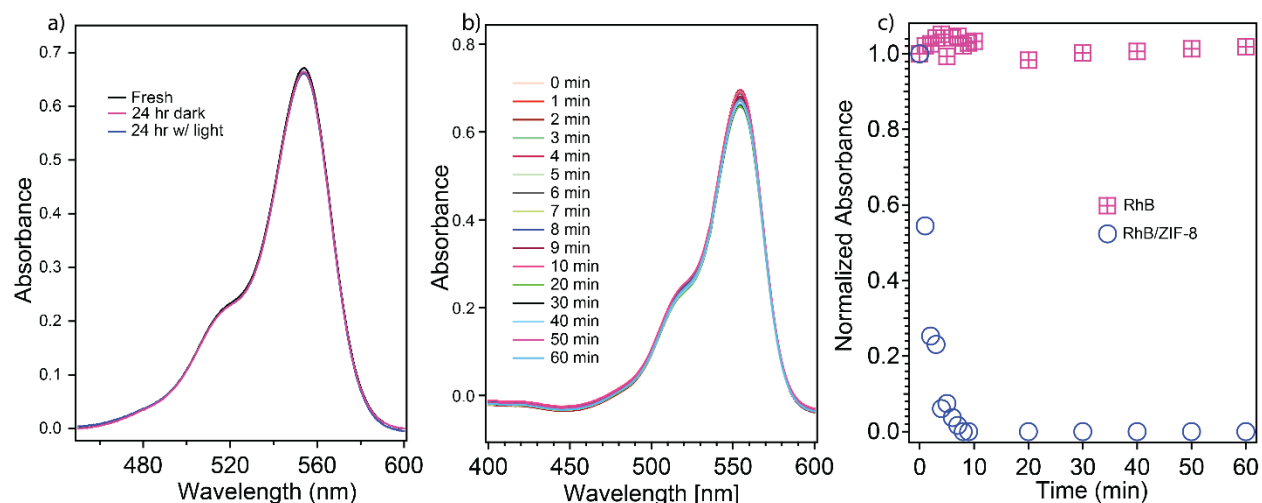

**Figure S2.** a) UV absorbance spectra of freshly prepared RhB in water (5 ppm) and spectra of the same concentration RhB solution under dark and ambient light after 24 hr and b) time-dependent absorbance of RhB under UV irradiation within 1 hr; and c) comparison of normalized absorbance of RhB in the presence and absence of ZIF-8 nanoparticles under UV condition with 1 hr.

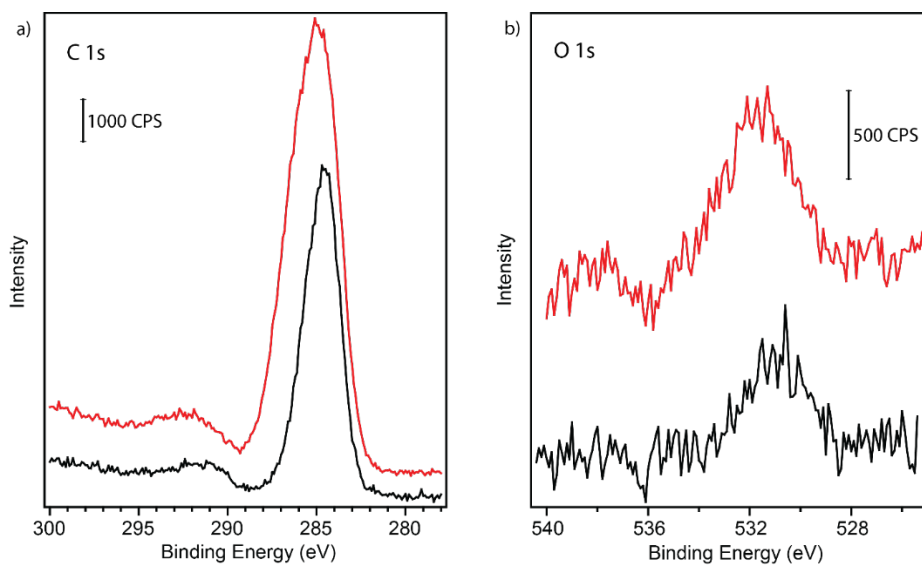

**Figure S3.** High resolution of C 1s and O 1s XPS spectra of ZIF-8 before (black) and after (red) RhB adsorption.

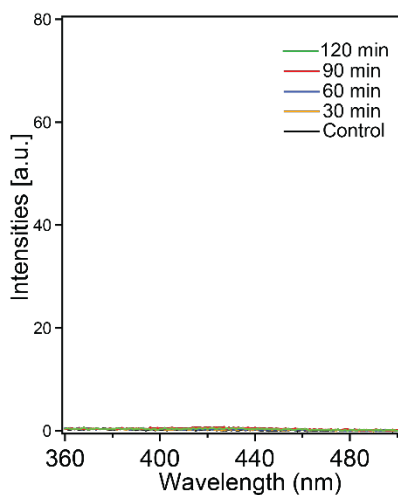

**Figure S4.** PL spectra of 2 mM of terephthalic acid in 0.5 mM NaOH solution under UV radiation for different period of time. The intensity scale is as same as the one shown in Figure 8a for comparison.

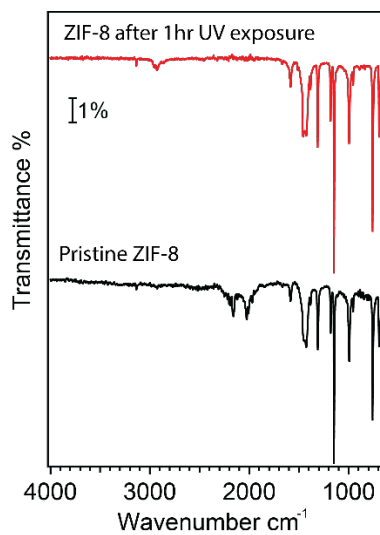

**Figure S5.** ATR-IR spectra of ZIF-8 before and after exposure to UV irradiation for 60 min. No chemical change was observed indicating the chemical stability of ZIF-8 under UV and its regeneration potential. The peaks in the range of 2200 to 1900  $\text{cm}^{-1}$  are corresponding to atmosphere  $\text{CO}_2$ .

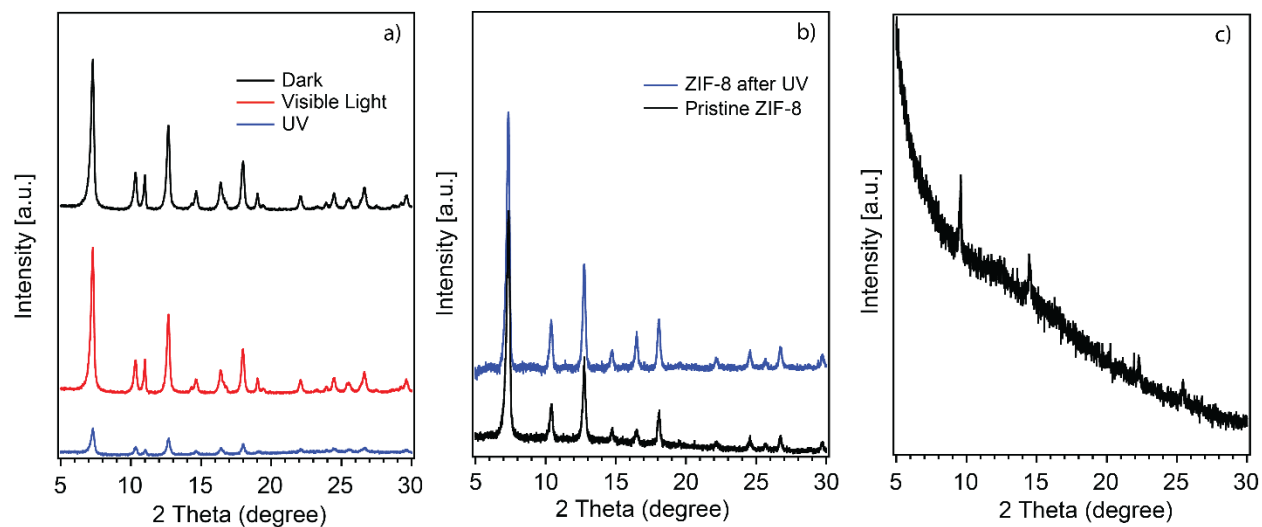

**Figure S6.** PXRD patterns of a) nanosized ZIF-8 after adsorbing rhodamine B in dark, visible light, and UV conditions, b) nanosized ZIF-8 before and after being immersed in water for 60 min under UV irradiation; and c) pure rhodamine B powder.

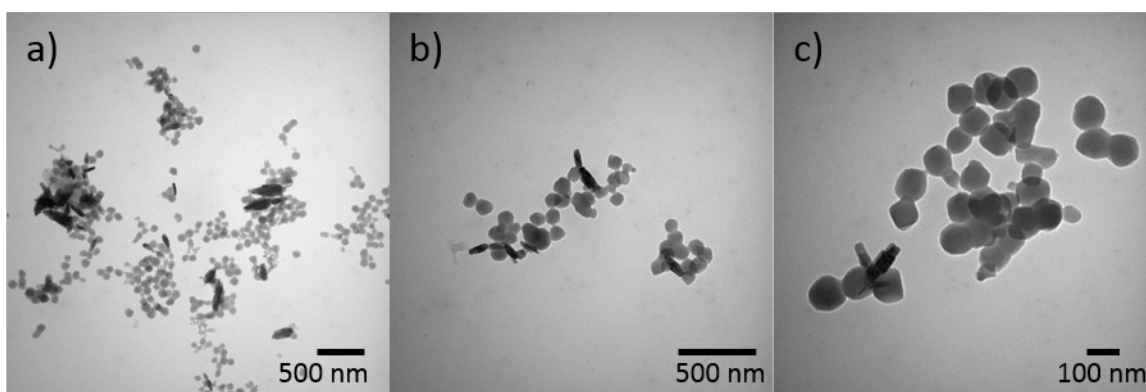

**Figure S7.** TEM images of ZIF-8 after adsorbing RhB (5 ppm) in water for 1 hour under visible light condition. a) – c) represent the magnifications of 30K, 50K, and 100K, respectively.

### T-plot analysis

Based on our  $N_2$  gas adsorption isotherm data, we applied the t-Plot method to assess the external surface areas of ZIF-8 nanocrystals before and after rhodamine B adsorption in visible light condition. We found that the calculated external surface area of ZIF-8 nanocrystals increased from  $113.25 \text{ m}^2/\text{g}$  to  $151.09 \text{ m}^2/\text{g}$  after adsorbing rhodamine B, which again confirms rhodamine B adsorbed on the external surface of ZIF-8 nanocrystals.

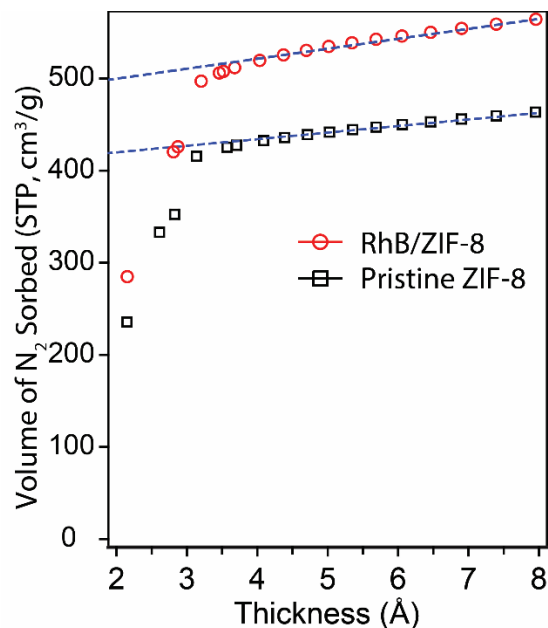

**Figure S8.** t-plots of ZIF-8 nanocrystals before and after rhodamine B adsorption under visible light for 1 hr.

The statistical thickness  $t$  (Å) was determined based on the Harkins-Jura Equation [Harkins et al., J. Chem. Phys. 1943, 11, 431]:

$$t = \sqrt{\frac{13.99}{0.034 - \log P/P_0}}$$

where  $P/P_0$  is the relative pressure values obtained during the  $N_2$  adsorption isotherm measurement. The external surface area ( $m^2/g$ ) was calculated using the built-in program in the Micromeritics software by applying this equation:

$$S_{ext} = \frac{(s \text{ cm}^3/g \cdot \text{Å STP}) * (10^{10} \text{ Å/m}) * (D \text{ cm}^3 \text{ liquid/cm}^3 \text{ STP})}{F * (10^6 \text{ cm}^3/m^3)}$$

where  $s$  is the slope of the linear region of a  $V_{ads}$ - $t$  plot;  $V_{ads}$  is the  $N_2$  adsorbed amount at each relative pressure condition measured in the adsorption isotherm at 77K;  $D$  is the density conversion factor (0.001547 in the case of  $N_2$  at 77K and 1 atm, calculated as shown below);  $F$  is the surface area conversion factor (0.975 as the instrument was calibrated using 1000 Å pore size silica).

$$D = \frac{\rho_{gas}}{\rho_{liquid}} = \frac{V_{liquid}}{V_{gas}} = \frac{0.03468 \text{ L/mol}}{22.414 \text{ L/mol}} = 0.001547$$

where  $\rho_{gas}$  and  $\rho_{liquid}$  are the density of  $N_2$  at gas and liquid phases at 77K and 1 atm. The ratio of the density can be converted to the reciprocal of its volume at the same condition. The molar volume of  $N_2$  in gas phase is considered as the molar volume of an ideal gas; while the molar volume of  $N_2$  in liquid phase is based on the isothermal properties for  $N_2$  on NIST (<http://webbook.nist.gov/chemistry/fluid/>) by setting temperature to 77K and pressure at 1 atm.

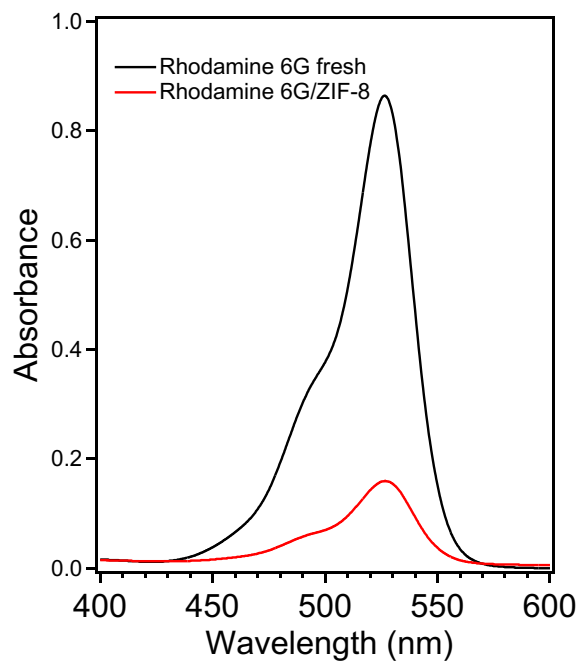

**Figure S9.** UV absorbance of rhodamine 6G (5 ppm in water) before and after mixing with nanosized ZIF-8 for 1 hr under ambient light.
